# Supplementary material for: The S2 subunit of spike encodes diverse targets for functional antibody responses to SARS-CoV-2
Source: PubMed Central journal article supplement (PMC11324185; doi:10.1371/journal.ppat.1012383), 2024-08-02

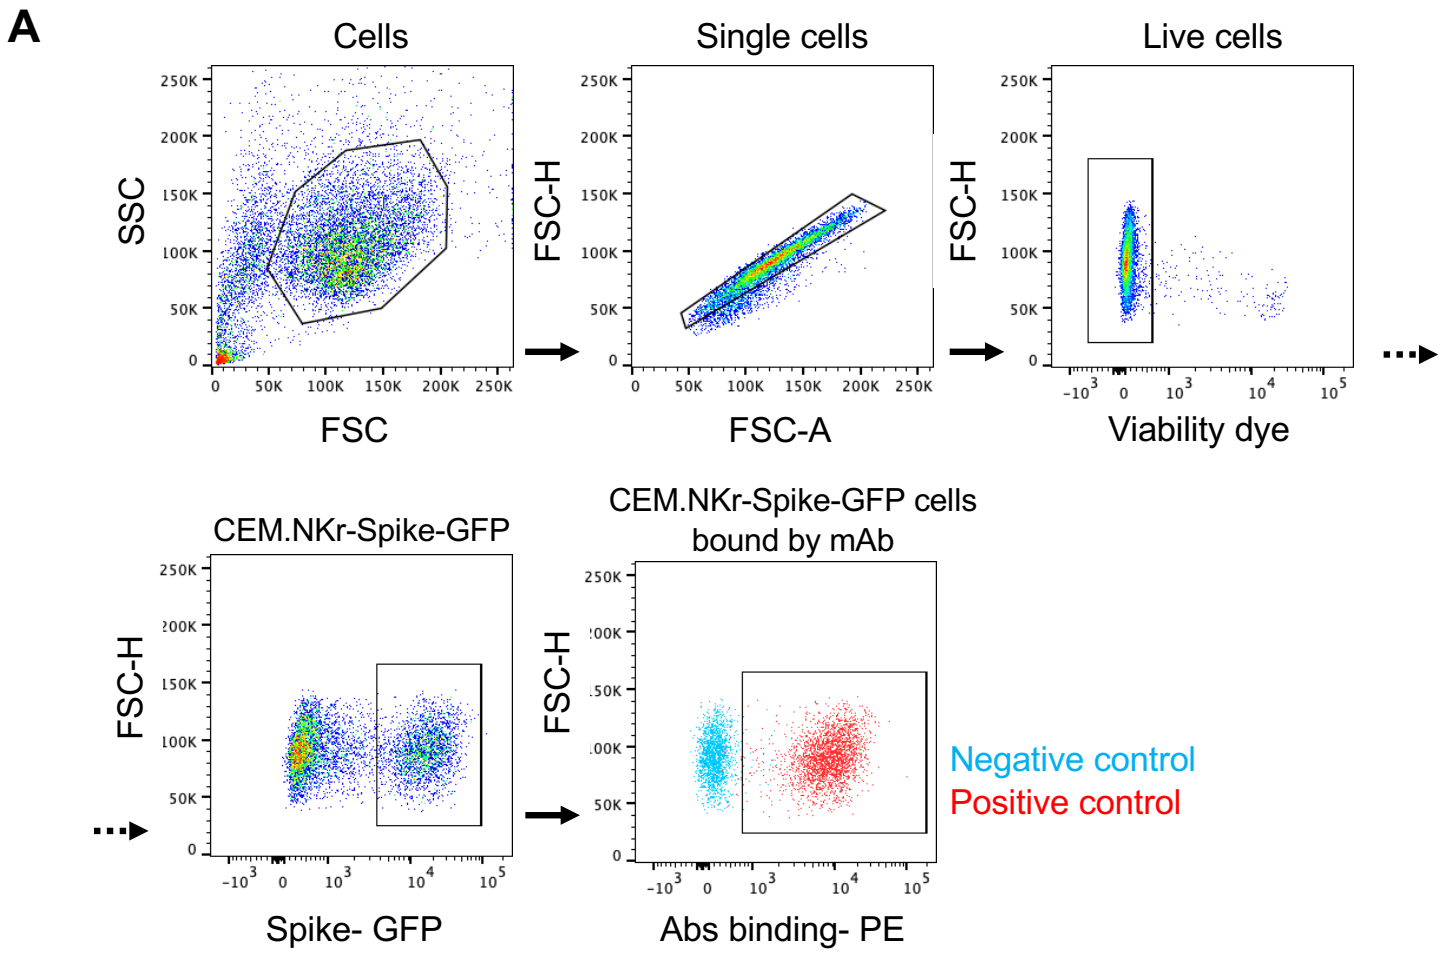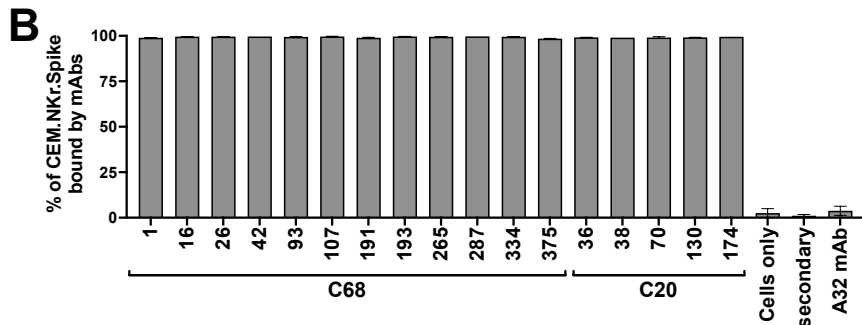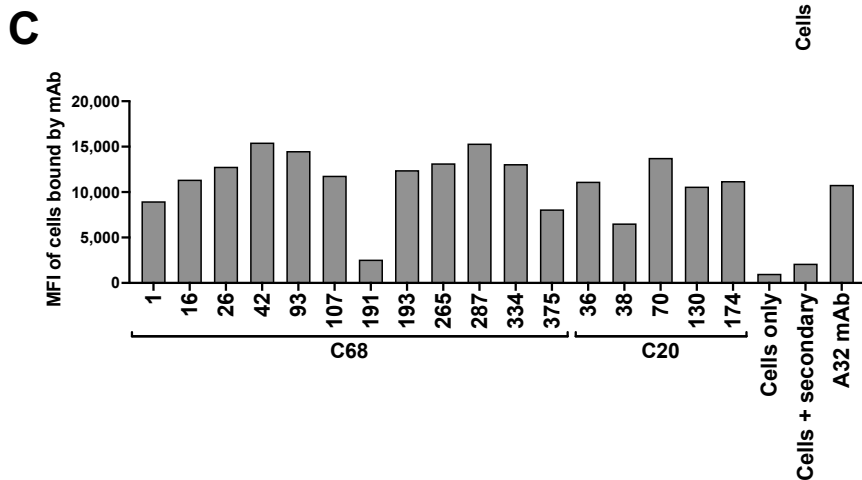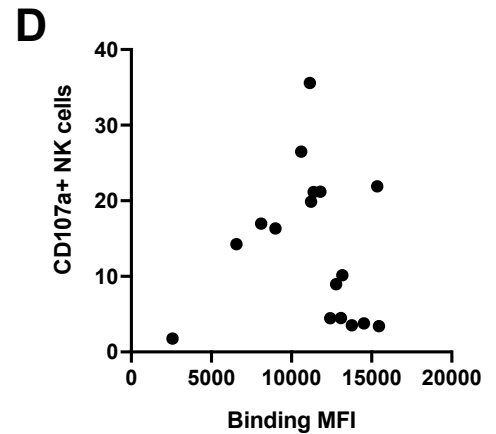

Supplement: ppat.1012383.s003.pdf [file ppat.1012383.s003.pdf]
