# Supplementary material for: The S2 subunit of spike encodes diverse targets for functional antibody responses to SARS-CoV-2
Source: PubMed Central journal article supplement (PMC11324185; doi:10.1371/journal.ppat.1012383), 2024-08-02
Supplement: ppat.1012383.s005.pdf [file ppat.1012383.s005.pdf]

A

Biotinylated mAb (100ng/mL)

| Blocking mAb (2500 ng/mL) | Biotinylated mAb (100ng/mL) |        |        |        |        |        |        |        |        |        |        |        |         |         |         |         |         |         |         |         |         |         |         |         |         |        |        |        |         |       |     |          |          |   |
|---------------------------|-----------------------------|--------|--------|--------|--------|--------|--------|--------|--------|--------|--------|--------|---------|---------|---------|---------|---------|---------|---------|---------|---------|---------|---------|---------|---------|--------|--------|--------|---------|-------|-----|----------|----------|---|
|                           | C68.1                       | C68.14 | C68.16 | C68.23 | C68.26 | C68.35 | C68.40 | C68.42 | C68.43 | C68.49 | C68.81 | C68.93 | C68.107 | C68.109 | C68.144 | C68.191 | C68.193 | C68.204 | C68.228 | C68.251 | C68.265 | C68.287 | C68.334 | C68.337 | C68.375 | C20.38 | C20.89 | C20.70 | C20.130 | C13B8 | B6  | CV2-2164 | CV2-2333 |   |
| C68.1                     | 98                          | 0      | 0      | 2      | 0      | 101    | 0      | 89     | 0      | 0      | 0      | 8      | 0       | 0       | 100     | 0       | 0       | 22      | 0       | 94      | 3       | 99      | 6       | 0       | 100     | 3      | 0      | 101    | 19      | 0     | 0   | 97       | 0        |   |
| C68.4                     | 0                           | 0      | 0      | 5      | 0      | 0      | 44     | 0      | 0      | 0      | 0      | 0      | 0       | 0       | 0       | 0       | 0       | 0       | 0       | 0       | 0       | 0       | 9       | 0       | 0       | 0      | 51     | 0      | 0       | 0     | 26  | 0        |          |   |
| C68.5                     | 2                           | 0      | 0      | 1      | 0      | 1      | 17     | 0      | 13     | 0      | 2      | 0      | 0       | 0       | 12      | 14      | 0       | 0       | 6       | 0       | 1       | 0       | 5       | 23      | 4       | 12     | 0      | 26     | 0       | 0     | 0   | 8        | 49       |   |
| C68.14                    | 0                           | 90     | 10     | 0      | 0      | 86     | 4      | 0      | 0      | 11     | 0      | 87     | 3       | 0       | 95      | 0       | 0       | 0       | 13      | 85      | 6       | 0       | 2       | 0       | 0       | 2      | 0      | 100    | 0       | 0     | 5   | 92       | 0        |   |
| C68.16                    | 2                           | 0      | 100    | 1      | 0      | 1      | 1      | 1      | 25     | 5      | 1      | 7      | 80      | 0       | 17      | 0       | 3       | 0       | 40      | 2       | 7       | 0       | 2       | 0       | 0       | 53     | 0      | 14     | 38      | 0     | 12  | 0        | 0        |   |
| C68.23                    | 0                           | 76     | 0      | 60     | 98     | 2      | 0      | 0      | 0      | 100    | 16     | 0      | 59      | 94      | 0       | 0       | 36      | 100     | 59      | 0       | 96      | 0       | 98      | 99      | 0       | 0      | 0      | 52     | 0       | 0     | 0   | 0        | 0        |   |
| C68.26                    | 0                           | 12     | 29     | 53     | 100    | 0      | 0      | 0      | 0      | 100    | 0      | 12     | 39      | 97      | 5       | 0       | 0       | 100     | 20      | 9       | 89      | 0       | 100     | 100     | 4       | 28     | 0      | 12     | 36      | 0     | 8   | 0        | 0        |   |
| C68.35                    | 54                          | 95     | 22     | 1      | 3      | 95     | 43     | 86     | 0      | 0      | 0      | 95     | 27      | 0       | 99      | 13      | 0       | 14      | 10      | 98      | 0       | 2       | 0       | 0       | 96      | 25     | 100    | 18     | 0       | 1     | 100 | 0        | 0        |   |
| C68.40                    | 4                           | 9      | 4      | 3      | 16     | 4      | 87     | 1      | 0      | 0      | 14     | 0      | 0       | 0       | 0       | 0       | 9       | 0       | 4       | 0       | 5       | 6       | 3       | 22      | 0       | 6      | 0      | 6      | 0       | 0     | 1   | 12       |          |   |
| C68.42                    | 98                          | 87     | 0      | 0      | 0      | 101    | 2      | 96     | 5      | 0      | 9      | 99     | 0       | 0       | 100     | 0       | 0       | 69      | 0       | 99      | 0       | 100     | 0       | 0       | 99      | 5      | 0      | 101    | 24      | 0     | 2   | 99       | 2        |   |
| C68.43                    | 0                           | 0      | 1      | 0      | 0      | 0      | 0      | 0      | 65     | 1      | 30     | 19     | 0       | 0       | 8       | 73      | 0       | 13      | 1       | 0       | 3       | 1       | 0       | 0       | 22      | 20     | 0      | 32     | 34      | 0     | 6   | 0        | 75       |   |
| C68.49                    | 0                           | 0      | 25     | 6      | 58     | 2      | 0      | 1      | 0      | 97     | 9      | 11     | 24      | 41      | 3       | 0       | 0       | 97      | 19      | 0       | 47      | 0       | 81      | 91      | 0       | 31     | 0      | 14     | 40      | 0     | 14  | 0        | 0        |   |
| C68.72                    | 2                           | 11     | 0      | 0      | 0      | 4      | 0      | 1      | 0      | 53     | 0      | 0      | 0       | 0       | 0       | 0       | 4       | 0       | 0       | 0       | 10      | 0       | 5       | 0       | 0       | 0      | 0      | 0      | 0       | 0     | 0   | 0        | 0        |   |
| C68.81                    | 2                           | 14     | 0      | 1      | 0      | 2      | 38     | 1      | 9      | 2      | 77     | 0      | 0       | 0       | 0       | 0       | 0       | 0       | 0       | 0       | 2       | 2       | 1       | 0       | 0       | 0      | 0      | 99     | 0       | 0     | 24  | 0        | 0        |   |
| C68.93                    | 0                           | 99     | 28     | 3      | 0      | 99     | 14     | 91     | 0      | 4      | 10     | 99     | 37      | 0       | 99      | 0       | 0       | 10      | 35      | 97      | 10      | 0       | 3       | 26      | 96      | 28     | 0      | 101    | 24      | 0     | 21  | 97       | 12       |   |
| C68.97                    | 50                          | 91     | 7      | 0      | 0      | 92     | 12     | 71     | 50     | 0      | 0      | 81     | 6       | 0       | 98      | 24      | 4       | 32      | 0       | 93      | 2       | 7       | 0       | 0       | 82      | 0      | 100    | 12     | 0       | 2     | 89  | 10       | 0        |   |
| C68.107                   | 2                           | 8      | 101    | 0      | 0      | 8      | 2      | 0      | 0      | 16     | 10     | 3      | 99      | 0       | 10      | 0       | 49      | 20      | 76      | 2       | 6       | 0       | 2       | 0       | 0       | 69     | 0      | 17     | 34      | 1     | 17  | 0        | 0        |   |
| C68.109                   | 2                           | 8      | 1      | 65     | 98     | 0      | 0      | 0      | 0      | 100    | 10     | 0      | 36      | 95      | 0       | 0       | 0       | 100     | 5       | 0       | 79      | 0       | 99      | 99      | 0       | 30     | 0      | 3      | 47      | 0     | 9   | 0        | 0        |   |
| C68.144                   | 24                          | 91     | 0      | 1      | 0      | 91     | 0      | 59     | 10     | 0      | 0      | 89     | 0       | 0       | 97      | 3       | 0       | 6       | 5       | 86      | 2       | 3       | 2       | 0       | 80      | 15     | 0      | 101    | 20      | 0     | 0   | 83       | 0        |   |
| C68.191                   | 2                           | 0      | 17     | 4      | 0      | 5      | 45     | 0      | 92     | 7      | 0      | 9      | 0       | 0       | 18      | 94      | 0       | 6       | 14      | 0       | 4       | 2       | 7       | 0       | 0       | 30     | 0      | 27     | 33      | 2     | 2   | 48       | 93       |   |
| C68.193                   | 1                           | 0      | 101    | 0      | 0      | 2      | 20     | 0      | 23     | 7      | 18     | 1      | 100     | 0       | 9       | 28      | 96      | 2       | 99      | 0       | 4       | 1       | 4       | 28      | 0       | 72     | 0      | 7      | 33      | 0     | 11  | 0        | 14       |   |
| C68.204                   | 1                           | 2      | 26     | 5      | 64     | 10     | 4      | 4      | 0      | 90     | 0      | 14     | 28      | 54      | 10      | 6       | 0       | 97      | 19      | 0       | 56      | 4       | 82      | 90      | 17      | 27     | 0      | 8      | 20      | 2     | 11  | 7        | 6        |   |
| C68.228                   | 0                           | 0      | 100    | 0      | 0      | 0      | 1      | 0      | 0      | 0      | 9      | 0      | 99      | 0       | 0       | 0       | 88      | 0       | 92      | 0       | 0       | 0       | 0       | 0       | 0       | 0      | 39     | 0      | 0       | 0     | 0   | 0        | 0        |   |
| C68.251                   | 90                          | 95     | 0      | 1      | 2      | 99     | 0      | 91     | 8      | 0      | 0      | 97     | 11      | 0       | 99      | 10      | 0       | 65      | 0       | 98      | 0       | 16      | 9       | 0       | 99      | 14     | 0      | 101    | 7       | 0     | 0   | 97       | 12       |   |
| C68.265                   | 0                           | 0      | 62     | 92     | 101    | 0      | 0      | 0      | 0      | 100    | 0      | 2      | 0       | 99      | 4       | 0       | 0       | 100     | 2       | 0       | 97      | 0       | 101     | 100     | 0       | 11     | 7      | 0      | 35      | 0     | 8   | 0        | 0        |   |
| C68.287                   | 80                          | 0      | 11     | 3      | 0      | 24     | 41     | 0      | 0      | 0      | 0      | 10     | 0       | 0       | 84      | 9       | 0       | 95      | 11      | 3       | 7       | 85      | 7       | 0       | 95      | 28     | 0      | 101    | 23      | 0     | 10  | 95       | 0        |   |
| C68.334                   | 2                           | 0      | 9      | 55     | 91     | 0      | 15     | 0      | 0      | 99     | 9      | 0      | 27      | 94      | 8       | 0       | 0       | 99      | 28      | 0       | 72      | 1       | 99      | 99      | 3       | 30     | 0      | 7      | 19      | 0     | 11  | 2        | 8        |   |
| C68.337                   | 3                           | 6      | 0      | 54     | 99     | 2      | 6      | 3      | 0      | 100    | 5      | 0      | 59      | 96      | 0       | 0       | 23      | 99      | 55      | 0       | 96      | 6       | 98      | 89      | 0       | 0      | 37     | 0      | 7       | 0     | 2   | 0        | 2        |   |
| C68.375                   | 75                          | 15     | 3      | 0      | 3      | 95     | 0      | 89     | 0      | 5      | 5      | 93     | 25      | 0       | 97      | 5       | 0       | 97      | 20      | 91      | 6       | 84      | 3       | 0       | 97      | 27     | 0      | 101    | 16      | 0     | 6   | 93       | 0        |   |
| C20.36                    | 5                           | 18     | 0      | 0      | 9      | 2      | 0      | 9      | 0      | 5      | 2      | 0      | 0       | 0       | 0       | 1       | 0       | 0       | 0       | 10      | 1       | 0       | 0       | 0       | 0       | 1      | 0      | 31     | 0       | 2     | 0   | 0        | 0        |   |
| C20.38                    | 1                           | 9      | 16     | 4      | 0      | 0      | 0      | 7      | 0      | 4      | 0      | 3      | 1       | 0       | 11      | 0       | 0       | 11      | 0       | 1       | 28      | 0       | 0       | 3       | 3       | 0      | 3      | 81     | 0       | 3     | 10  | 0        | 11       | 0 |
| C20.59                    | 0                           | 5      | 0      | 0      | 0      | 0      | 0      | 16     | 0      | 17     | 0      | 10     | 0       | 5       | 5       | 2       | 3       | 0       | 0       | 0       | 0       | 1       | 0       | 0       | 0       | 0      | 52     | 2      | 9       | 1     | 3   | 1        | 0        |   |
| C20.70                    | 6                           | 35     | 0      | 4      | 0      | 4      | 40     | 10     | 0      | 22     | 0      | 22     | 0       | 0       | 0       | 0       | 0       | 0       | 0       | 0       | 4       | 1       | 0       | 0       | 2       | 0      | 0      | 9      | 0       | 0     | 0   | 65       | 0        |   |
| C20.130                   | 1                           | 5      | 0      | 3      | 0      | 10     | 10     | 0      | 0      | 3      | 59     | 2      | 0       | 1       | 0       | 0       | 0       | 0       | 0       | 0       | 3       | 0       | 0       | 0       | 41      | 0      | 0      | 94     | 0       | 0     | 10  | 17       | 0        |   |
| C20.174                   | 2                           | 1      | 0      | 1      | 0      | 3      | 2      | 0      | 0      | 36     | 0      | 0      | 0       | 19      | 0       | 0       | 0       | 0       | 0       | 0       | 5       | 0       | 16      | 77      | 0       | 0      | 0      | 0      | 0       | 0     | 0   | 0        | 5        |   |
| B6                        | 0                           | 18     | 36     | 1      | 0      | 2      | 1      | 2      | 0      | 0      | 13     | 7      | 19      | 0       | 7       | 5       | 0       | 3       | 17      | 0       | 4       | 2       | 2       | 0       | 0       | 23     | 0      | 12     | 28      | 2     | 90  | 0        | 0        |   |
| CV2-2002                  | 2                           | 26     | 2      | 3      | 4      | 1      | 0      | 2      | 36     | 9      | 23     | 15     | 7       | 0       | 4       | 49      | 0       | 2       | 8       | 0       | 1       | 5       | 0       | 0       | 4       | 12     | 0      | 22     | 39      | 0     | 2   | 0        | 55       |   |
| CV2-2164                  | 58                          | 94     | 0      | 2      | 0      | 95     | 0      | 81     | 24     | 0      | 0      | 85     | 0       | 0       | 97      | 0       | 0       | 42      | 0       | 83      | 0       | 4       | 0       | 0       | 82      | 53     | 0      | 0      | 9       | 0     | 0   | 85       | 0        |   |
| CV2-2333                  | 1                           | 7      | 0      | 2      | 25     | 3      | 37     | 2      | 80     | 5      | 0      | 5      | 57      | 7       | 0       | 0       | 26      | 0       | 53      | 0       | 21      | 2       | 1       | 0       | 0       | 0      | 0      | 47     | 0       | 3     | 50  | 90       | 0        |   |
| CV3-25                    | 1                           | 12     | 13     | 0      | 6      | 0      | 16     | 0      | 10     | 8      | 18     | 17     | 8       | 4       | 0       | 0       | 4       | 5       | 0       | 0       | 1       | 30      | 6       | 29      | 0       | 4      | 25     | 0      | 71      | 10    | 18  | 0        | 0        |   |
| 76E1                      | 1                           | 4      | 0      | 0      | 0      | 0      | 0      | 0      | 12     | 12     | 0      | 0      | 10      | 0       | 6       | 0       | 0       | 1       | 0       | 1       | 0       | 0       | 2       | 0       | 9       | 0      | 0      | 12     | 9       | 3     | 0   | 1        | 0        |   |
| VP12E7                    | 0                           | 4      | 0      | 0      | 0      | 0      | 3      | 0      | 8      | 8      | 4      | 4      | 8       | 1       | 1       | 7       | 2       | 2       | 0       | 2       | 2       | 2       | 0       | 1       | 2       | 0      | 0      | 5      | 6       | 2     | 0   | 4        | 0        |   |
| C13B8                     | 1                           | 28     | 4      | 0      | 0      | 1      | 0      | 7      | 33     | 33     | 30     | 30     | 12      | 0       | 2       | 12      | 5       | 7       | 0       | 9       | 3       | 3       | 4       | 3       | 0       | 0      | 0      | 40     | 83      | 2     | 0   | 4        | 0        |   |

B

Biotinylated mAb (1 ug/mL)

| Blocking mAb (25 ug/mL) | Biotinylated mAb (1 ug/mL) |        |        |         |         |         |        |        |         |         |         |           |        |      |       |        |
|-------------------------|----------------------------|--------|--------|---------|---------|---------|--------|--------|---------|---------|---------|-----------|--------|------|-------|--------|
|                         | C20.38                     | C20.59 | C20.67 | C20.119 | C20.192 | C20.210 | C68.16 | C68.81 | C68.107 | C68.204 | C68.287 | COV2-2164 | VP12E7 | 76E1 | C13B8 | CV3-25 |
| C20.36                  | 0                          | 1      | 0      | 0       | 0       | 0       | 0      | 0      | 0       | 0       | 0       | 1         | 4      | 2    | 4     | 0      |
| C20.38                  | 25                         | 0      | 98     | 98      | 1       | 0       | 17     | 1      | 51      | 16      | 6       | 3         | 4      | 5    | 0     | 0      |
| C20.59                  | 0                          | 14     | 0      | 3       | 0       | 0       | 0      | 21     | 2       | 47      | 16      | 7         | 3      | 4    | 5     | 0      |
| C20.67                  | 0                          | 0      | 97     | 3       | 48      | 3       | 1      | 1      | 0       | 13      | 11      | 0         | 3      | 0    | 6     | 0      |
| C20.82                  | 0                          | 0      | 0      | 0       | 0       | 0       | 0      | 24     | 1       | 0       | 5       | 1         | 1      | 2    | 3     | 0      |
| C20.119                 | 0                          | 0      | 0      | 86      | 0       | 1       | 0      | 7      | 0       | 15      | 13      | 1         | 8      | 7    | 10    | 0      |
| C20.130                 | 0                          | 0      | 0      | 0       | 0       | 2       | 1      | 0      | 72      | 0       | 0       | 0         | 3      | 1    | 7     | 3      |
| C20.174                 | 0                          | 0      | 0      | 0       | 0       | 0       | 0      | 0      | 2       | 0       | 0       | 0         | 3      | 0    | 2     | 0      |
| C20.192                 | 0                          | 1      | 95     | 0       | 91      | 0       | 0      | 4      | 12      | 2       | 1       | 4         | 2      | 6    | 0     | 0      |
| C20.210                 | 0                          | 0      | 43     | 2       | 0       | 49      | 0      | 0      | 4       | 11      | 14      | 0         | 4      | 4    | 3     | 0      |
| C68.1                   | 0                          | 0      | 0      | 0       | 0       | 0       | 0      | 6      | 3       | 5       | 0       | 0         | 3      | 3    | 0     | 0      |
| C68.4                   | 1                          | 0      | 0      | 0       | 0       | 1       | 0      | 0      | 1       | 0       | 0       | 0         | 0      | 0    | 0     | 2      |
| C68.16                  | 0                          | 0      | 0      | 9       | 0       | 2       | 51     | 0      | 7       | 0       | 0       | 0         | 4      | 2    | 3     | 0      |
| C68.72                  | 0                          | 0      | 0      | 0       | 0       | 0       | 0      | 1      | 5       | 0       | 3       | 5         | 0      | 6    | 0     | 0      |
| C68.81                  | 0                          | 0      | 0      | 0       | 0       | 0       | 0      | 0      | 0       | 0       | 0       | 0         | 7      | 0    | 2     | 0      |
| C68.107                 | 0                          | 0      | 0      | 6       | 0       | 0       | 91     | 0      | 61      | 45      | 0       | 0         | 1      | 8    | 7     | 1      |
| C68.204                 | 0                          | 3      | 0      | 0       | 1       |         |        |        |         |         |         |           |        |      |       |        |
