# Supplementary material for: The S2 subunit of spike encodes diverse targets for functional antibody responses to SARS-CoV-2
Source: PubMed Central journal article supplement (PMC11324185; doi:10.1371/journal.ppat.1012383), 2024-08-02
Supplement: ppat.1012383.s006.pdf [file ppat.1012383.s006.pdf]

| Comp Group | mAb ID   | IGHV     | IGLV or IGKV | Heavy %SHM | Heavy CDR3 length |
|------------|----------|----------|--------------|------------|-------------------|
| Group 1    | C68.1    | HV5-10-1 | KV4-1        | 5.0        | 13                |
|            | C68.14   | HV1-69   | KV2-30       | 4.0        | 20                |
|            | C68.35   | HV1-69   | KV3-11       | 1.4        | 15                |
|            | C68.42   | HV3-30   | KV1-5        | 4.0        | 18                |
|            | C68.93   | HV4-31   | KV3-20       | 3.2        | 16                |
|            | C68.97   | HV1-69   | KV3-11       | 1.4        | 15                |
|            | C68.144  | HV1-69   | KV3-11       | 2.2        | 15                |
|            | C68.251  | HV1-69   | KV3-11       | 3.0        | 15                |
|            | C68.287  | HV1-46   | KV1-5        | 6.3        | 14                |
|            | C68.375  | HV3-30   | KV3-20       | 4.6        | 9                 |
|            | C20.70   | HV3-23   | LV2-14       | 2.5        | 14                |
| Group 2    | C68.23   | HV1-2    | KV4-1        | 2.5        | 15                |
|            | C68.26   | HV3-30   | LV1-47       | 3.6        | 13                |
|            | C68.49   | HV3-30   | KV1-5        | 3.6        | 14                |
|            | C68.109  | HV3-30   | KV3-20       | 3.6        | 14                |
|            | C68.204  | HV3-21   | KV1-NL1      | 4.6        | 17                |
|            | C68.265  | HV3-30   | KV1D-39      | 3.6        | 14                |
|            | C68.334  | HV4-59   | KV2D-28      | 4.7        | 14                |
|            | C68.337  | HV4-34   | KV1D-39      | 5.9        | 23                |
| C20.174    | HV3-30-3 | LV1-40   | 3.7          | 11         |                   |
| Group 3    | C68.16   | HV1-46   | KV3-20       | 2.8        | 13                |
|            | C68.107  | HV3-7    | KV1-12       | 4.1        | 22                |
|            | C68.193  | HV3-7    | LV3-19       | 1.5        | 24                |
|            | C68.228  | HV3-7    | KV3-15       | 3.4        | 22                |
|            | C20.38*  | HV3-23   | LV8-61       | 2.8        | 24                |
| Group 4    | C68.5    | HV1-3    | LV3-10       | 9.7        | 13                |
|            | C68.40   | HV3-7    | LV3-21       | 2.5        | 13                |
|            | C68.43   | HV3-74   | LV3-1        | 3.0        | 14                |
|            | C68.191  | HV3-23   | LV3-10       | 3.7        | 10                |
| Group 5    | C20.38*  | HV3-23   | LV8-61       | 2.8        | 24                |
|            | C20.67   | HV1-8    | KV3-15       | 0.5        | 22                |
|            | C20.192  | HV4-34   | LV2-14       | 1.3        | 18                |
|            | C20.210  | HV3-15   | LV2-11       | 10.0       | 20                |
| Group 6    | C68.81   | HV3-30   | LV3-10       | 4.1        | 15                |
|            | C20.59   | HV3-30-3 | LV3-1        | 1.6        | 15                |
|            | C20.119  | HV3-30-3 | LV2-8        | 12.9       | 14                |
|            | C20.130  | HV3-30-3 | LV3-10       | 4.9        | 14                |
|            | C20.36   | HV3-53   | KV1-5        | 0.3        | 9                 |
|            | C20.82   | IGHV4-31 | IGKV3-15     | 0.6        | 11                |
|            | C68.4    | HV4-59   | KV4-1        | 0.5        | 21                |
|            | C68.72   | HV1-2    | LV1-47       | 1.3        | 21                |
