# Supplementary material for: The S2 subunit of spike encodes diverse targets for functional antibody responses to SARS-CoV-2
Source: PubMed Central journal article supplement (PMC11324185; doi:10.1371/journal.ppat.1012383), 2024-08-02

**A****SARS-CoV-2 Spike**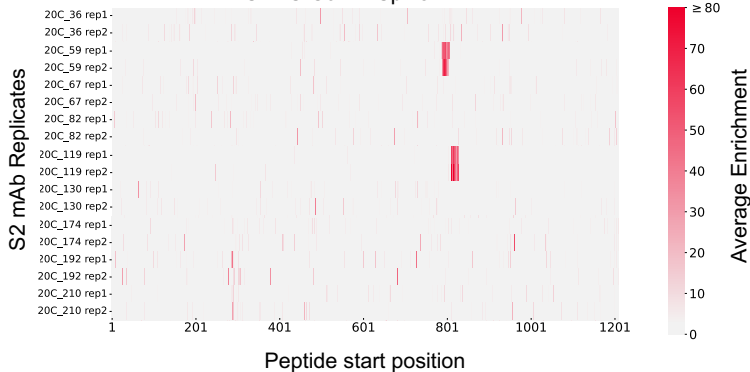**B****SARS-CoV-2 Spike**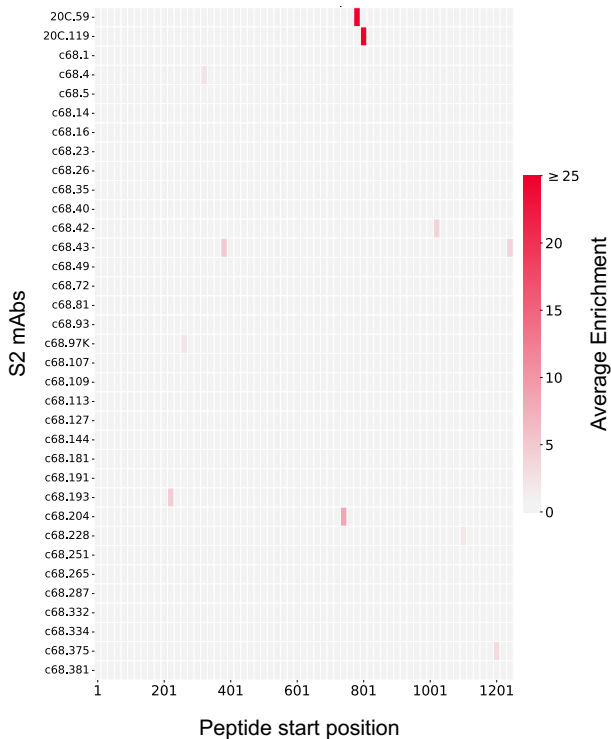

Supplement: ppat.1012383.s008.pdf [file ppat.1012383.s008.pdf]
