# Supplementary material for: The S2 subunit of spike encodes diverse targets for functional antibody responses to SARS-CoV-2
Source: PubMed Central journal article supplement (PMC11324185; doi:10.1371/journal.ppat.1012383), 2024-08-02
Supplement: ppat.1012383.s010.pdf [file ppat.1012383.s010.pdf]

|              |     |                                            |     |     |     |     |           |                               |  |
|--------------|-----|--------------------------------------------|-----|-----|-----|-----|-----------|-------------------------------|--|
|              | 740 | 750                                        | 760 | 770 | 780 | 790 | 800       | 810                           |  |
| SARS-CoV-2   | VDC | Y ICGDST EC SNLLQYGSFCTQLNRALTG IAVEQDKNTQ |     |     |     |     | EV FAQVKQ | IYKTPPIKDFGGFNFSQIL           |  |
| SARS-CoV-1   | VDC | NMY ICGDST ECANLLQYGSFCTQLNRALSGIAAEQDRN   |     |     |     |     | TR        | EV FAQVKQMYKTPTLKY FGGFNFSQIL |  |
| Conservation | *** | *****                                      |     |     |     |     | ***       | *****                         |  |
